# Supplementary material for: AgPt/MoS2 hybrid as electrochemical sensor for detecting H2O2 release from living cells
Source: Royal Society of Chemistry journal article supplement (doi:10.1039/d2nj02495k), 2022-01-01
Supplement: d2nj02495k8.pdf [file d2nj02495k8.pdf]

## Supplementary Information

### AgPt/MoS<sub>2</sub> hybrid as electrochemical sensor for detecting H<sub>2</sub>O<sub>2</sub> released from living cells

Xiaona Zhu<sup>1</sup>, Zegao Wang<sup>2</sup>, Mingyan Gao<sup>1</sup>, Yuqing Wang<sup>2</sup>, Jing Hu<sup>1</sup>, Zhengxun Song<sup>1</sup>,  
Zuobin Wang<sup>1,\*</sup> and Mingdong Dong<sup>2,\*</sup>

<sup>1</sup> International Research Centre for Nano Handling and Manufacturing of China, Changchun University of Science and Technology, Changchun 130022, China;

<sup>2</sup> Interdisciplinary Nanoscience Center (iNANO), Aarhus University, DK-8000 Aarhus C, Denmark;

\* Correspondence: [dong@inano.au.dk](mailto:dong@inano.au.dk); [WangZ@cust.edu.cn](mailto:WangZ@cust.edu.cn)

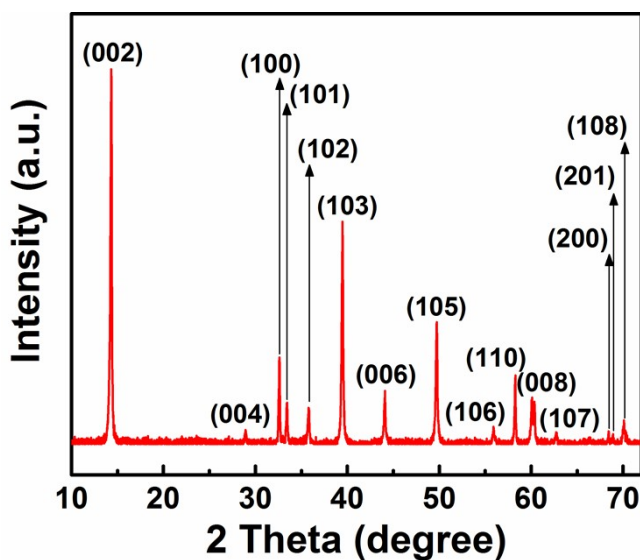

Figure S1. XRD pattern of MoS<sub>2</sub> nanosheets.

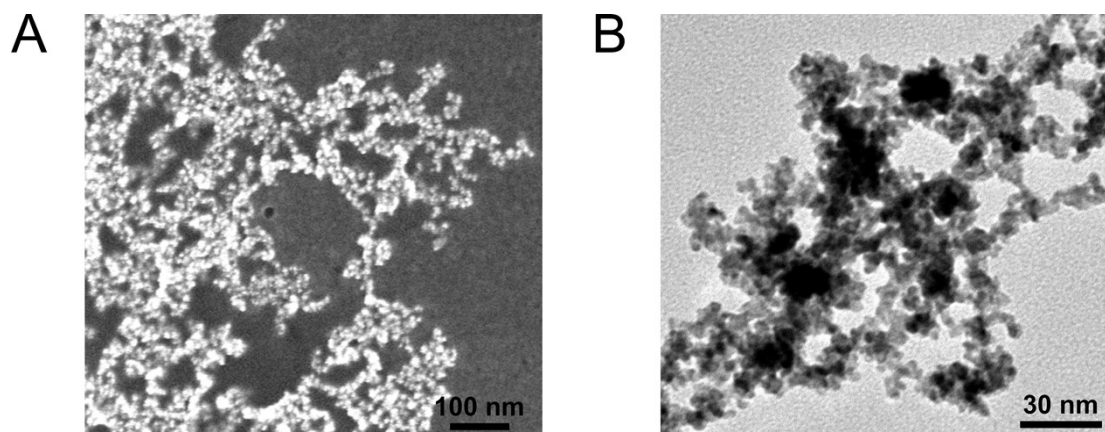

Figure S2. SEM (A) and TEM (B) image of bimetallic AgPt nanoparticles.

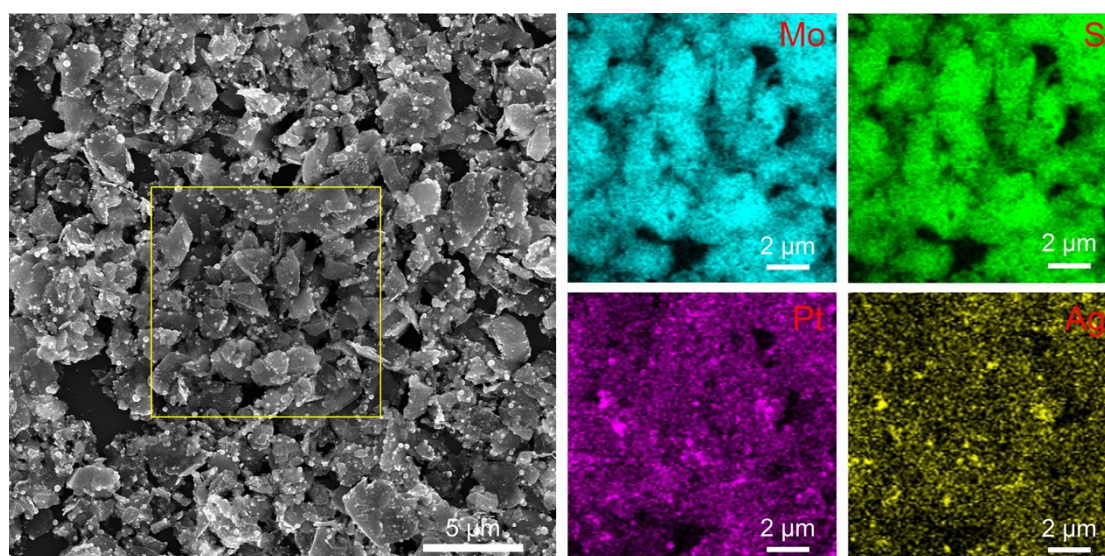

Figure S3. Elemental mapping of AgPt/MoS<sub>2</sub> nanohybrid.

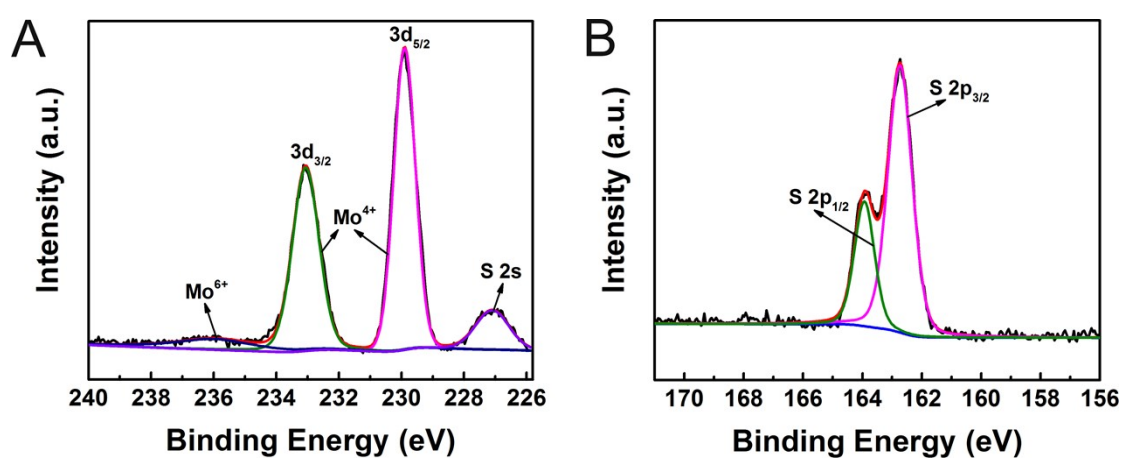

Figure S4. XPS spectra of the Mo 3d and S 2p in AgPt/MoS<sub>2</sub> nanohybrid respectively.

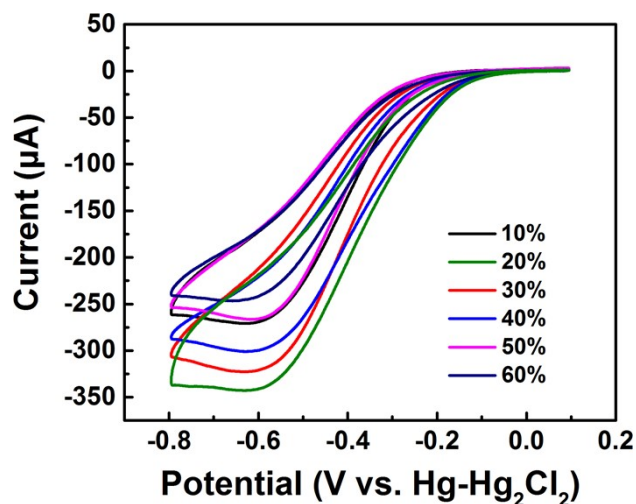

Figure S5. CV of the samples with different mass ratios of AgPt nanoparticles and MoS<sub>2</sub> nanosheets in N<sub>2</sub>-saturated 0.01 M PBS (PH 7.4) with 3 mM H<sub>2</sub>O<sub>2</sub> at the scan rate of 50 mVs<sup>-1</sup>.

To investigate changes in the morphology of AgPt/MoS<sub>2</sub> nanohybrid before and after testing, the AgPt/MoS<sub>2</sub>/chitosan-modified ITO electrode after testing was characterized by SEM, as shown in Figure S6. It can be seen that the morphology of AgPt/MoS<sub>2</sub> nanohybrid after testing is similar to the morphology (Figure 1B) before testing, which indicates that there are no obvious changes in the morphology of AgPt/MoS<sub>2</sub> nanohybrid as a catalyst before and after catalyzing H<sub>2</sub>O<sub>2</sub> reaction.

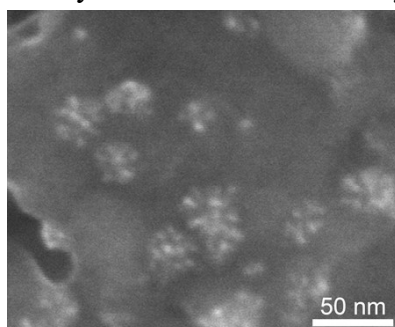

Figure S6. SEM image of AgPt/MoS<sub>2</sub>/chitosan after catalyzing H<sub>2</sub>O<sub>2</sub> reaction.
