# Supplementary figures and images for: AgPt/MoS2 hybrid as electrochemical sensor for detecting H2O2 release from living cells
Source: Royal Society of Chemistry journal article supplement (doi:10.1039/d2nj02495k), 2022-01-01

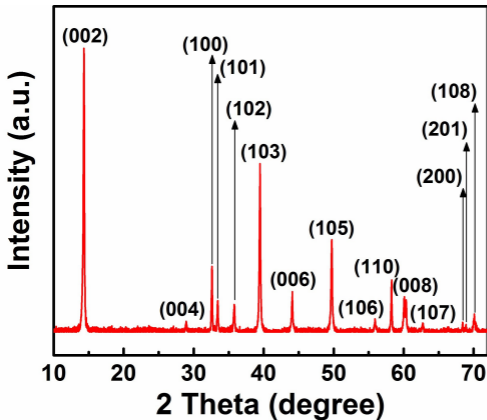

Supplement: d2nj02495k2.pdf [file d2nj02495k2.pdf]

A

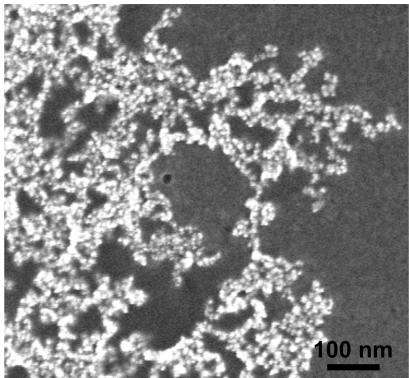

B

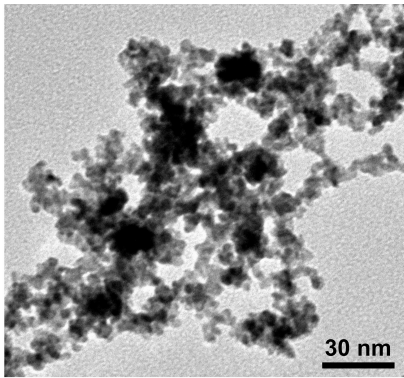

Supplement: d2nj02495k3.pdf [file d2nj02495k3.pdf]

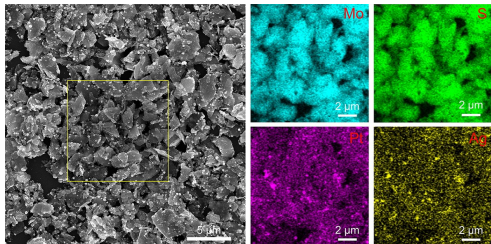

Supplement: d2nj02495k4.pdf [file d2nj02495k4.pdf]

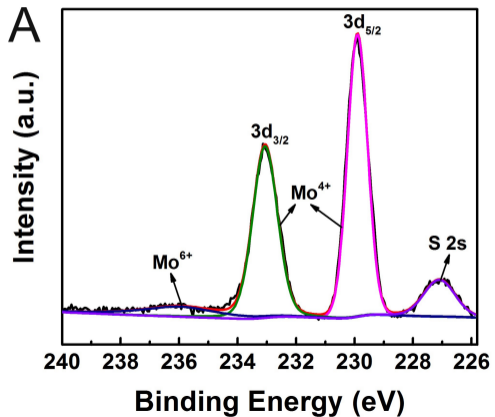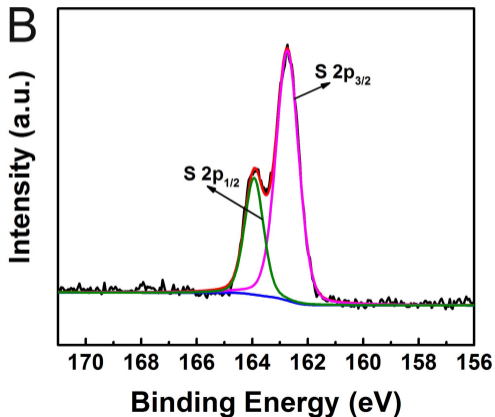

Supplement: d2nj02495k5.pdf [file d2nj02495k5.pdf]

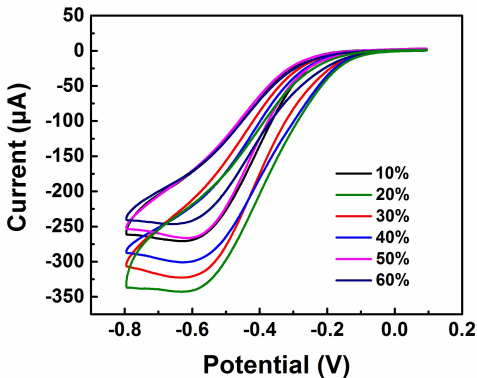

Supplement: d2nj02495k6.pdf [file d2nj02495k6.pdf]

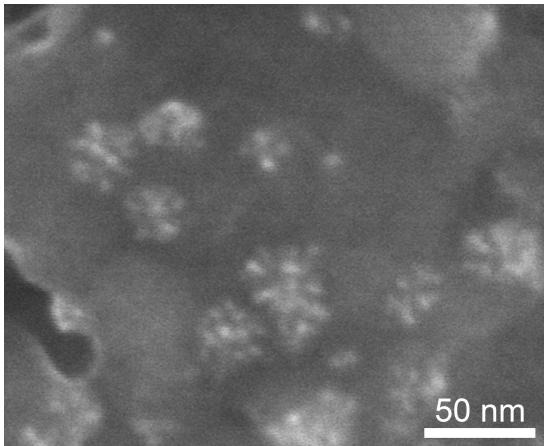

Supplement: d2nj02495k7.pdf [file d2nj02495k7.pdf]
